# Supplementary material
Source: Springer Nature journal article supplement (https://www.springermedizin.de/resource/supplementary/12911_2011_560_MOESM4_ESM.pdf/9525964)
Supplement: MOESM4 [file 9525964]

**(a) Consultand** Consultand

Enter details of the proband...

First name/ID:

**Personal details**

Sex and status:  Male  Female  Alive  Dead  Ashkenazi origin

Age or Age at death:  Exact:   Approx:

Year of birth:  Exact:   Approx:

**Breast cancer**  Age at diagnosis:  Exact:   Approx:   Unknown

**Contralateral BC**  Age at diagnosis:  Exact:   Approx:   Unknown

**Ovarian cancer**  Age at diagnosis:  Exact:   Approx:   Unknown

**Prostate cancer**  Age at diagnosis:  Exact:   Approx:   Unknown

**Pancreatic cancer**  Age at diagnosis:  Exact:   Approx:   Unknown

**Genetic testing**

Genetic test type:  Untested  Mutation search  Direct gene test

Mutation:  None  BRCA1  BRCA2

**(b) BOADICEA** Pedigree table view

Your input pedigree is listed below...

|    | Name    | Tgt | IndivID | FathID | MothID | Sex | Twin | Status | Age | Yob  | 1BrCa | 2BrCa | OvCa | ProCa | PanCa | Gtest | Mutn | Ashkn |
|----|---------|-----|---------|--------|--------|-----|------|--------|-----|------|-------|-------|------|-------|-------|-------|------|-------|
| 1  | Alison  | T   | 1       | 2      | 3      | F   |      | alive  | 44  | 1965 |       |       |      |       |       |       |      |       |
| 2  | Alice   |     | 3       | 6      | 7      | F   |      | dead   | 55  | 1940 | 55    |       |      |       |       |       |      |       |
| 3  | Eric    |     | 2       | 4      | 5      | M   |      | alive  | 70  | 1939 |       |       |      |       |       |       |      |       |
| 4  | George  |     | 4       |        |        | M   |      | dead   | 82  | 1914 |       |       |      |       |       |       |      |       |
| 5  | Millie  |     | 5       |        |        | F   |      | dead   | 80  | 1915 |       |       |      |       |       |       |      |       |
| 6  | Clive   |     | 6       |        |        | M   |      | dead   | 75  | 1916 |       |       |      |       |       |       |      |       |
| 7  | Rose    |     | 7       |        |        | F   |      | dead   | 45  | 1915 | 45    |       |      |       |       |       |      |       |
| 8  | Amy     |     | 8       | 6      | 7      | F   |      | dead   | 50  | 1942 | 50    |       |      |       |       |       |      |       |
| 9  | Michael |     | 9       |        |        | M   |      | alive  | 67  | 1942 |       |       |      |       |       |       |      |       |
| 10 | Amanda  |     | 10      | 9      | 8      | F   |      | alive  | 42  | 1967 |       |       |      |       |       |       |      |       |

Model parameters: UK/Default

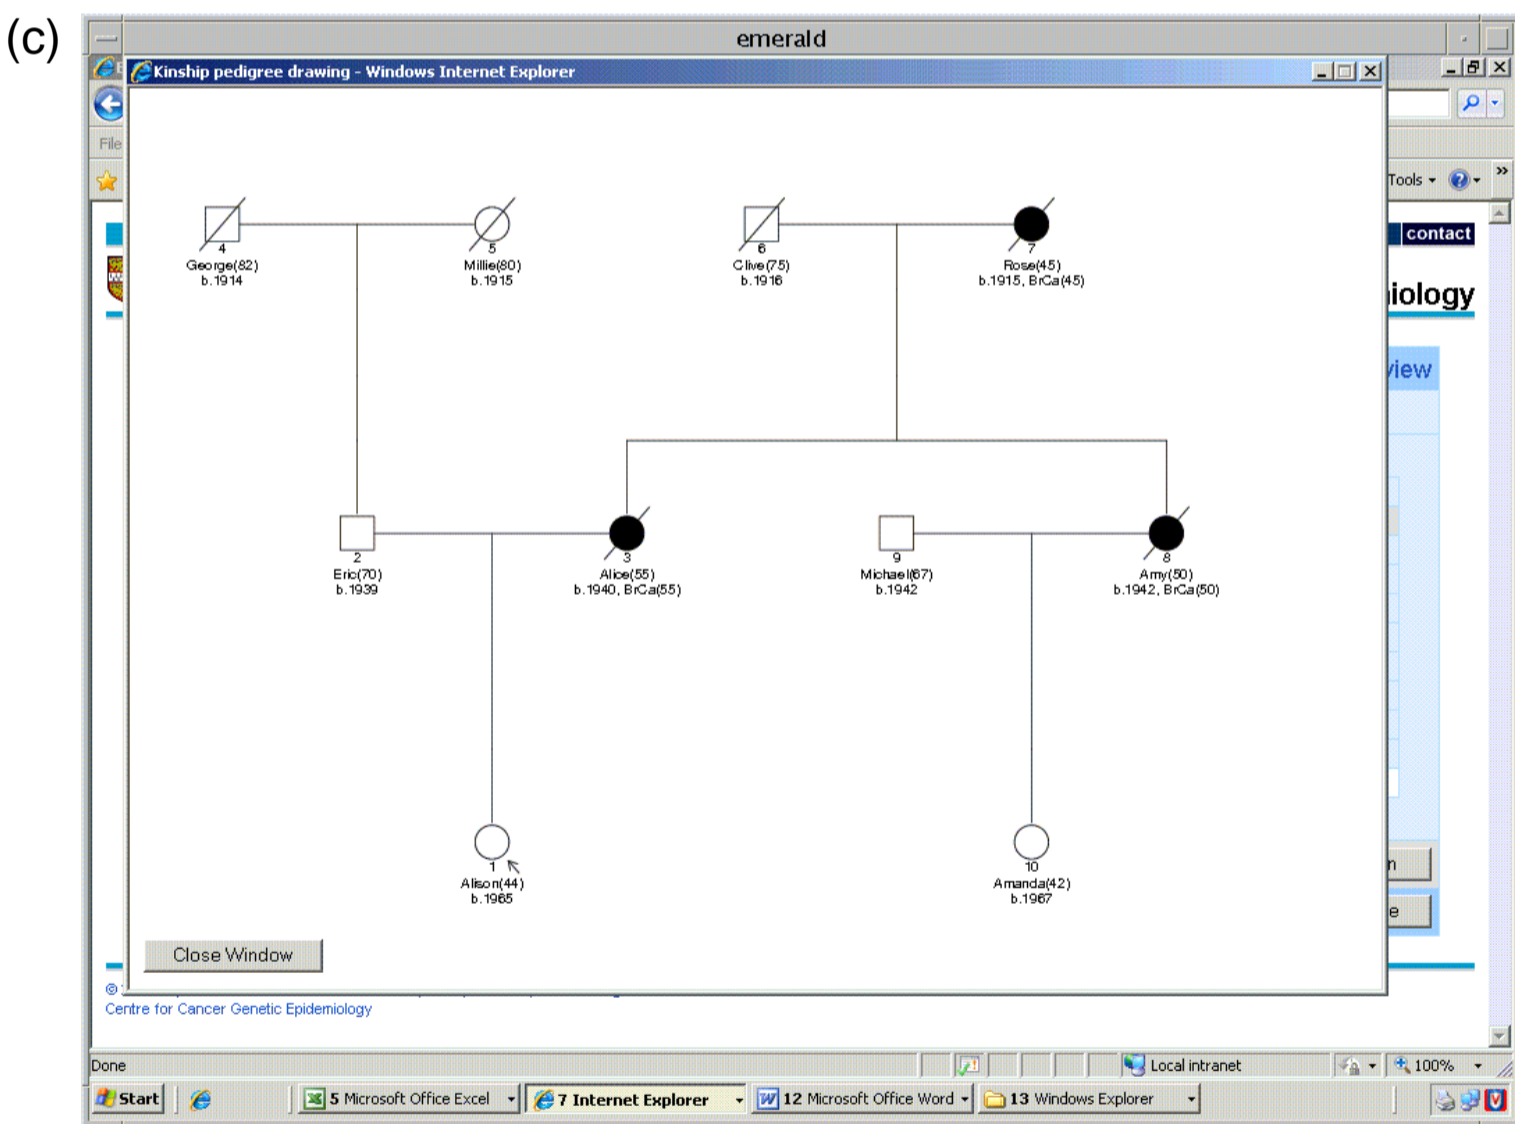

**(d) BOADICEA** Computed results

Computed results are as follows...

| Genetic status | Mutation carrier probabilities | Age | Breast cancer risks | Ovarian cancer risks |
|----------------|--------------------------------|-----|---------------------|----------------------|
| No mutation    | 0.9453                         | 45  | 0.0037              | 0.0004               |
| BRCA1          | 0.0215                         | 46  | 0.0077              | 0.0007               |
| BRCA2          | 0.0332                         | 47  | 0.0120              | 0.0011               |
|                |                                | 48  | 0.0165              | 0.0016               |
|                |                                | 49  | 0.0213              | 0.0021               |
|                |                                | 54  | 0.0478              | 0.0053               |
|                |                                | 59  | 0.0751              | 0.0099               |
|                |                                | 64  | 0.1007              | 0.0143               |
|                |                                | 69  | 0.1238              | 0.0184               |
|                |                                | 74  | 0.1454              | 0.0224               |
|                |                                | 79  | 0.1654              | 0.0263               |
|                |                                | 80  | 0.1690              | 0.0271               |

Model parameters

|                               |                                     |
|-------------------------------|-------------------------------------|
| Family member                 | Alison (1)                          |
| Mutation frequencies          | UK, BRCA1: 6.394d-4, BRCA2: 0.00102 |
| Mutation search sensitivities | Default, BRCA1: 0.7, BRCA2: 0.8     |

If the target has already developed breast cancer (BC), BC risks represent the risk of contralateral BC.
